# Supplementary material for: A bifunctional mitochondrial targeting AIE-active fluorescent probe with high sensitivity to hydrogen peroxide and viscosity for fatty liver diagnosis
Source: Royal Society of Chemistry journal article supplement (doi:10.1039/d1nj01712h), 2021-01-01
Supplement: d1nj01712h1.pdf [file d1nj01712h1.pdf]

## Supplementary Information

### A bifunctional mitochondrial-targeting AIE-active fluorescent probe with high sensitivity to hydrogen peroxide and viscosity for fatty liver diagnosis

Hong Xu<sup>†1</sup>, Jiehong Zhong<sup>‡2</sup>, Weihua Zhuang<sup>3</sup>, Jizhou Jiang<sup>4</sup>, Boxuan Ma<sup>1</sup>, Haiyang He<sup>1</sup>, Gaocan Li<sup>\*1</sup>, Yanbiao Liao<sup>\*\*3</sup> and Yunbing Wang<sup>1</sup>

<sup>1</sup> National Engineering Research Center for Biomaterials, Sichuan University, 29 Wangjiang Road, Chengdu 610064, China

<sup>2</sup> Alltech Medical Systems, LLC., 201 Tianqin Road, Chengdu 611731, China

<sup>3</sup> Department of Cardiology, West China Hospital, Sichuan University, 37 Guoxue Street, Chengdu 610041, China

<sup>4</sup> College of Polymer Science and Engineering, Sichuan University, 29 Wangjiang Road, Chengdu 610064, China

\* Corresponding author. National Engineering Research Center for Biomaterials, Sichuan University, 29 Wangjiang Road, Chengdu 610064, China

\*\* Corresponding author. Department of Cardiology, West China Hospital, Sichuan University, 37 Guoxue Street, Chengdu 610041, China

E-mail addresses: gaocanli@scu.edu.cn (G. Li), liaoyanbiao@foxmail.com (Y. Liao)

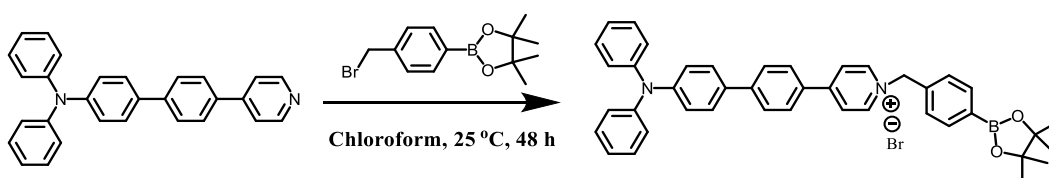

**Scheme S1.** Synthesis of TPP-Tba.

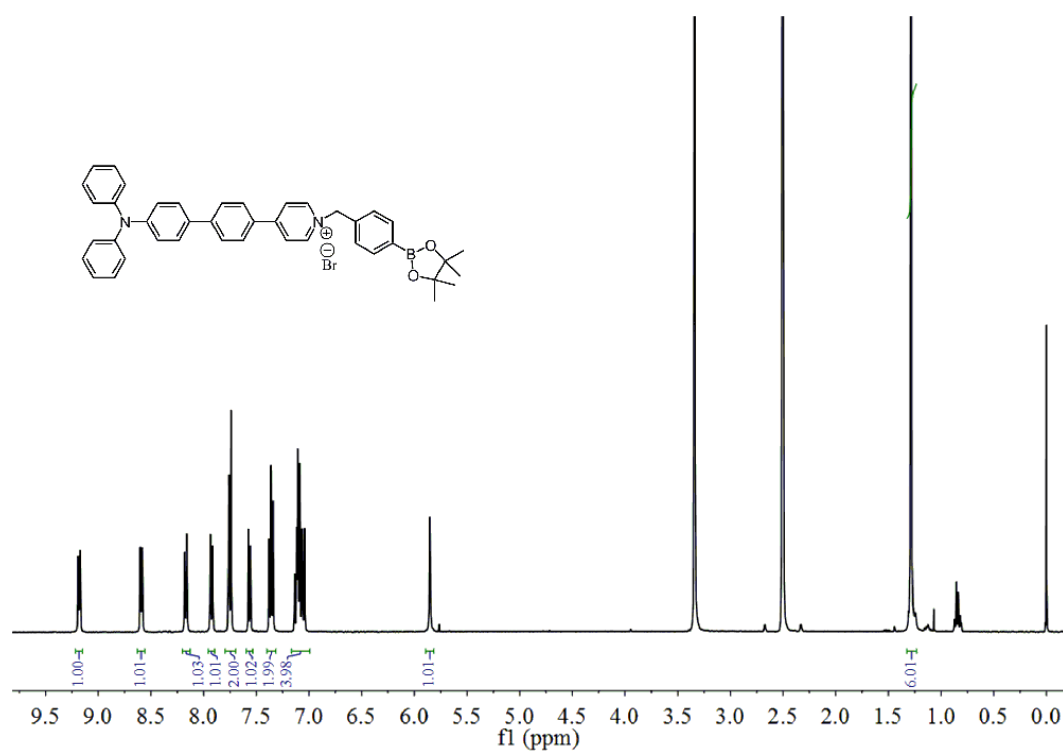

**Figure S1.**  $^1\text{H}$  NMR spectrum of compound **TPP-Tba** in  $\text{DMSO-}d_6$ .

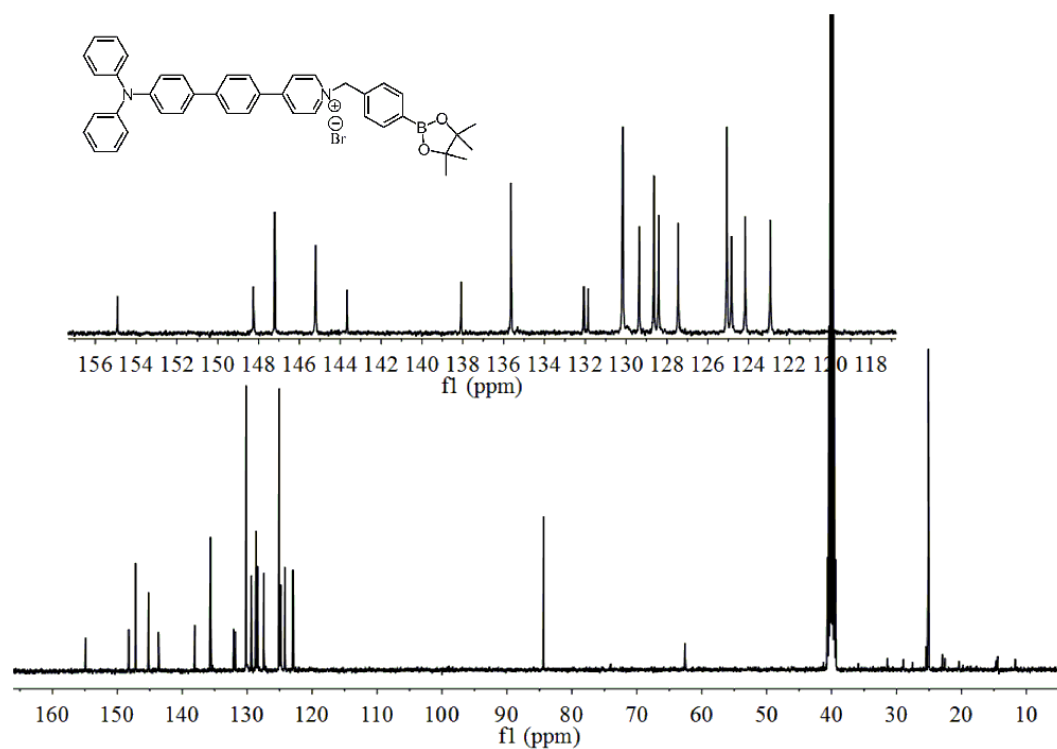

**Figure S2.**  $^{13}\text{C}$  NMR spectrum of **TPP-Tba** in  $\text{DMSO}-d_6$ .

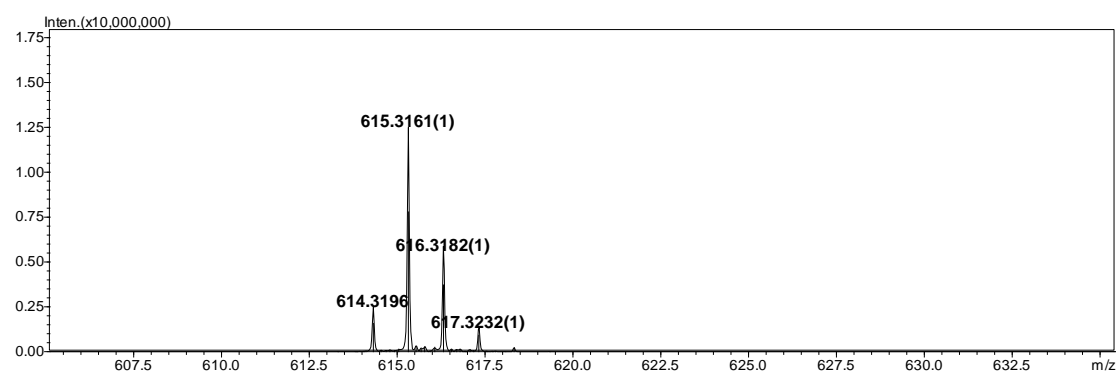

**Figure S3.** HRMS of TPP-Tba.

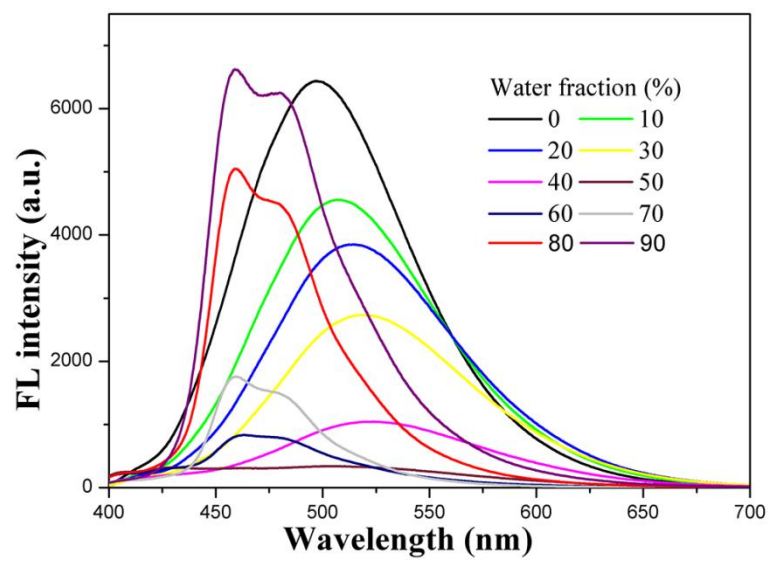

**Figure S4.** PL spectra of compound **1** (5  $\mu\text{M}$ ) in DMSO/water mixtures with different water fractions.  $\lambda_{\text{ex}} = 375 \text{ nm}$ .

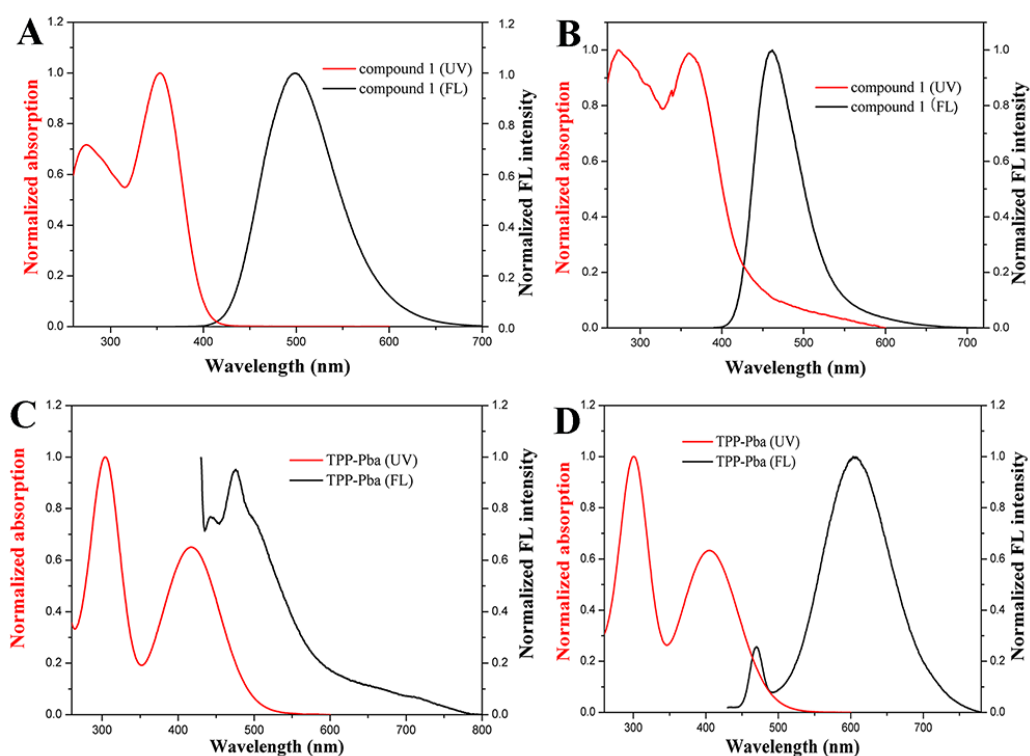

**Figure S5.** Normalized UV-Vis spectra and emission spectra of compound **1** in DMSO (A) and DMSO/PBS mixture (1 : 9, v/v, pH 7.4) (B),  $\lambda_{\text{ex}} = 375$  nm. Normalized UV-Vis spectra and emission spectra of **TPP-Tba** in DMSO (C) and DMSO/PBS mixture (1 : 9, v/v, pH 7.4) (D),  $\lambda_{\text{ex}} = 405$  nm.

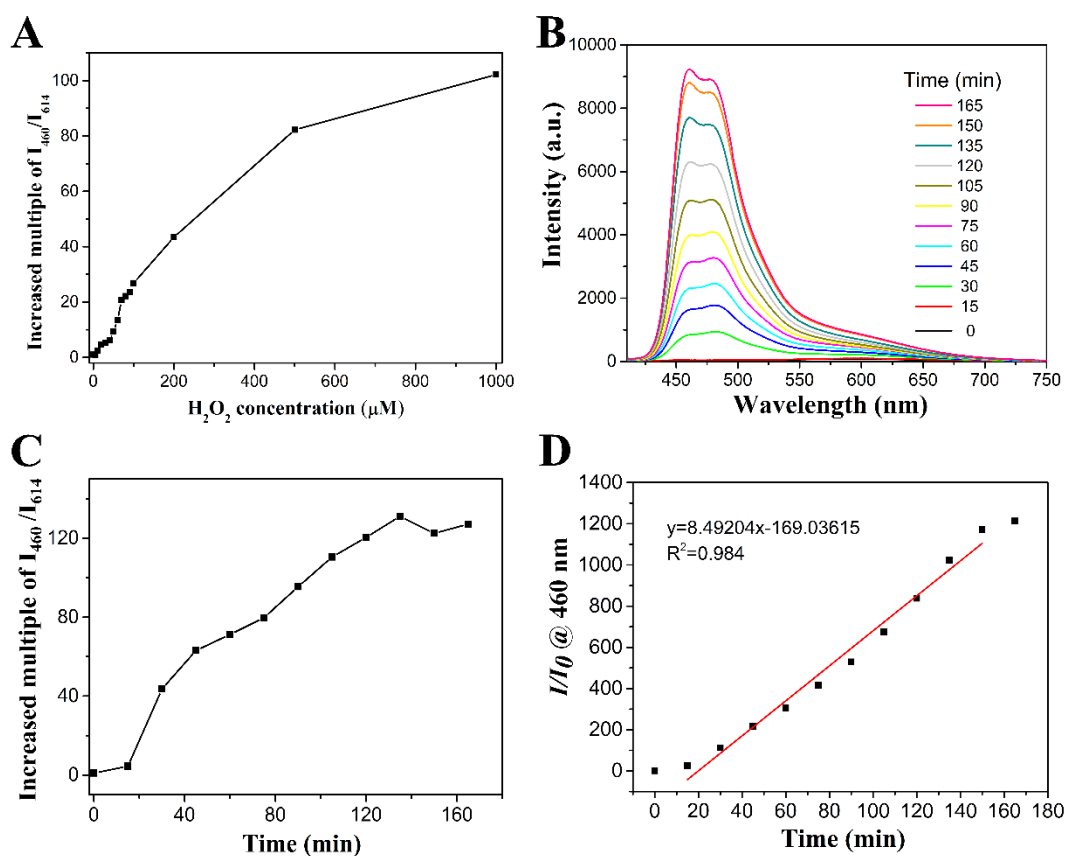

**Figure S6.** Increased multiple of the ratio the emission intensities at 460 nm and 614 nm with different  $H_2O_2$  concentrations (A). Time-dependent fluorescence spectra in the reaction of **TPP-Tba** (5  $\mu M$ ) with  $H_2O_2$  (1 mM) in DMSO/PBS mixture (1 : 9, v/v, pH 7.4) at 37  $^{\circ}C$  (B). The fluorescence intensity ratio at 460nm and 614nm (C) and the fluorescence enhancement multiples at 460nm (D) after the reaction of **TPP-Tba** and  $H_2O_2$  for different time.  $\lambda_{ex}$  = 405 nm.

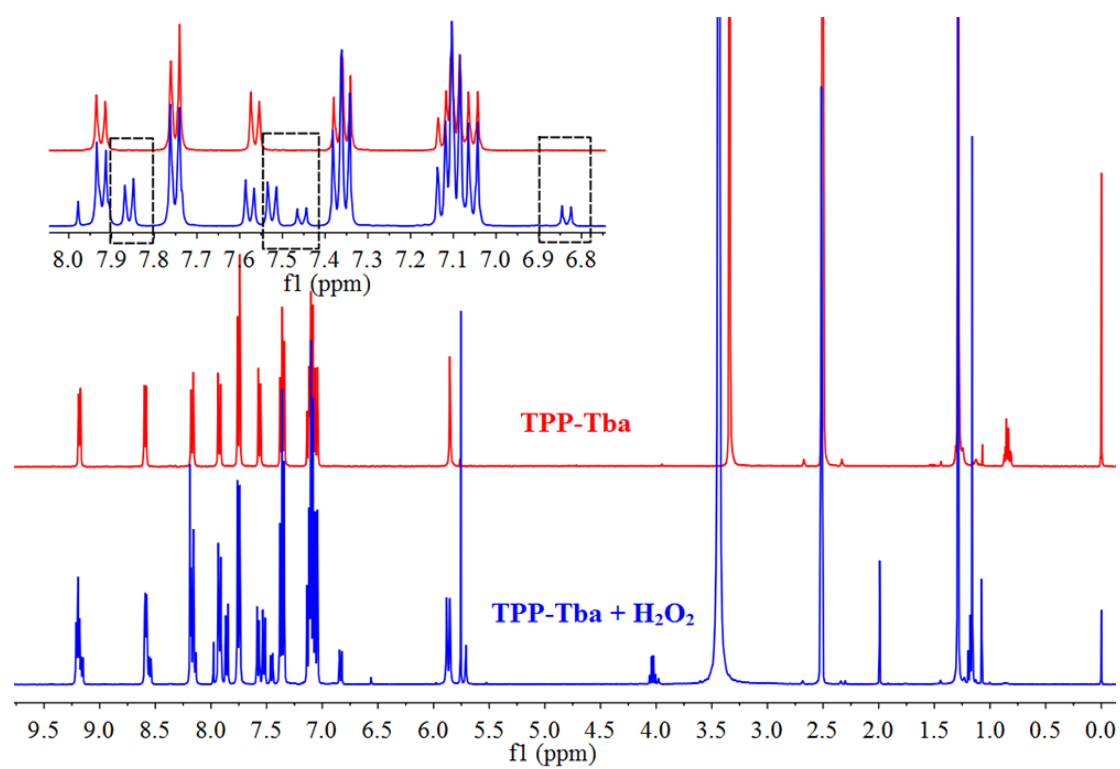

**Figure S7.**  $^1\text{H}$  NMR spectra of **TPP-Tba** and **TPP-Tba** with 1 mM  $\text{H}_2\text{O}_2$  in  $\text{DMSO-}d_6$ .



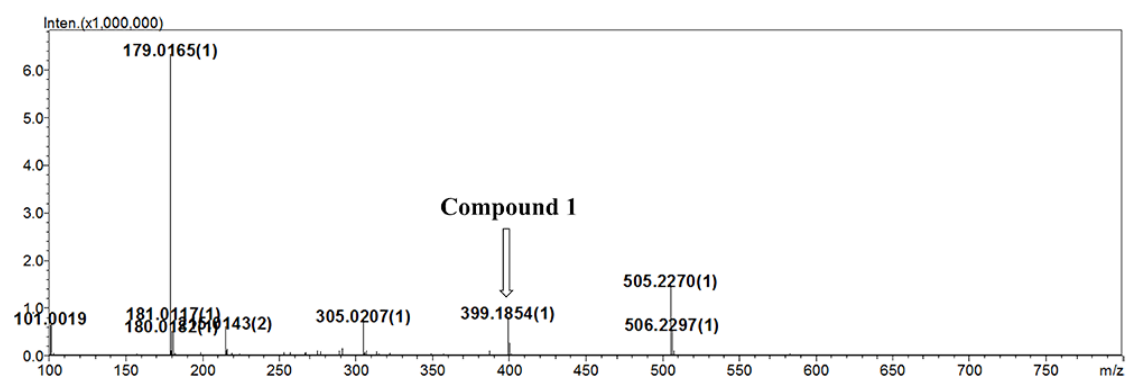

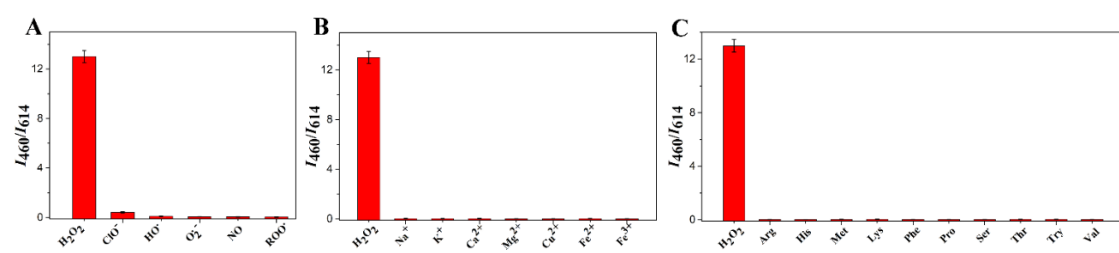

**Figure S9.** Fluorescence responses of **TPP-Tba** (5  $\mu$ M) to various (A) reactive oxygen species (1 mM), (B) cations (1 mM) and (C) amino acids (1 mM).  $\lambda_{ex}$  = 405 nm.

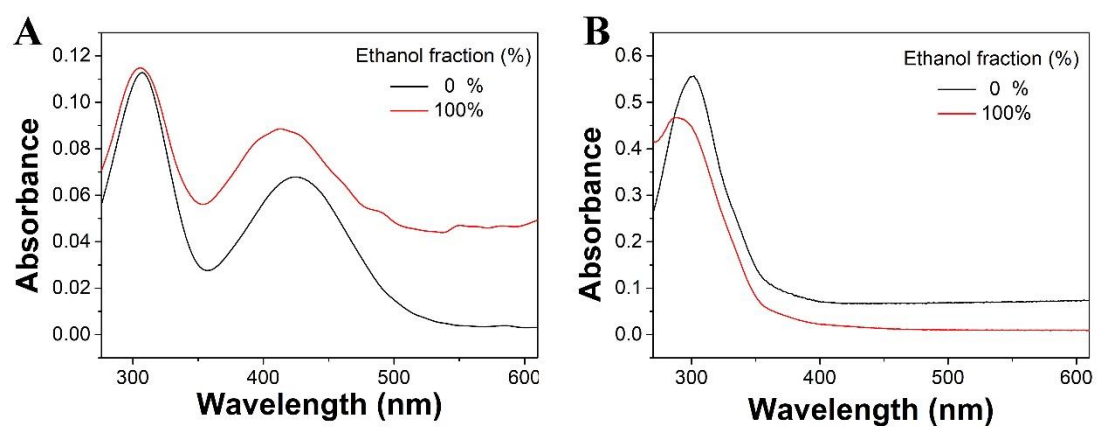

**Figure S10.** The UV/vis spectra of **TPP-Tba** (A) and compound **1** (B) in different viscosity environments.

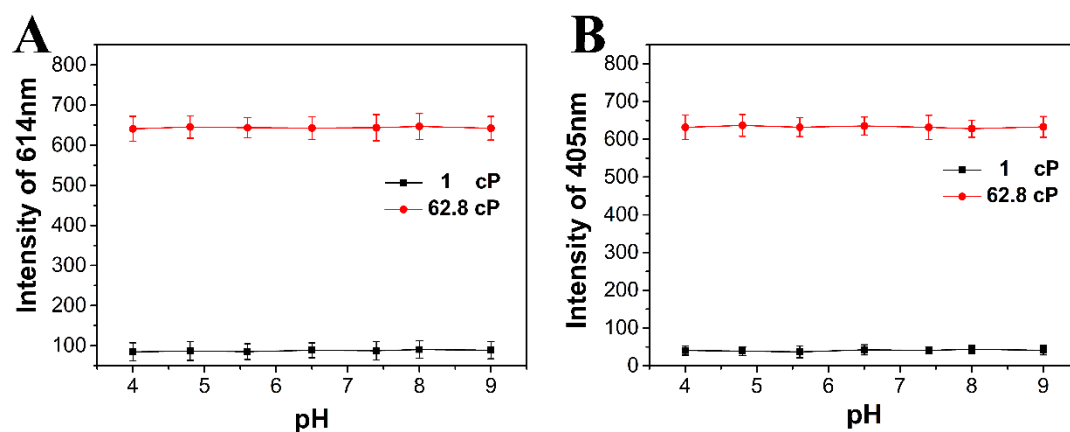

**Figure S11.** The emission intensity changes (at 614 nm and 405 nm) of **TPP-Tba** and compound **1** respectively at different pH and viscosity PBS buffer. The excitation wavelengths for **TPP-Tba** and compound **1** were 405 nm and 358 nm, severally.

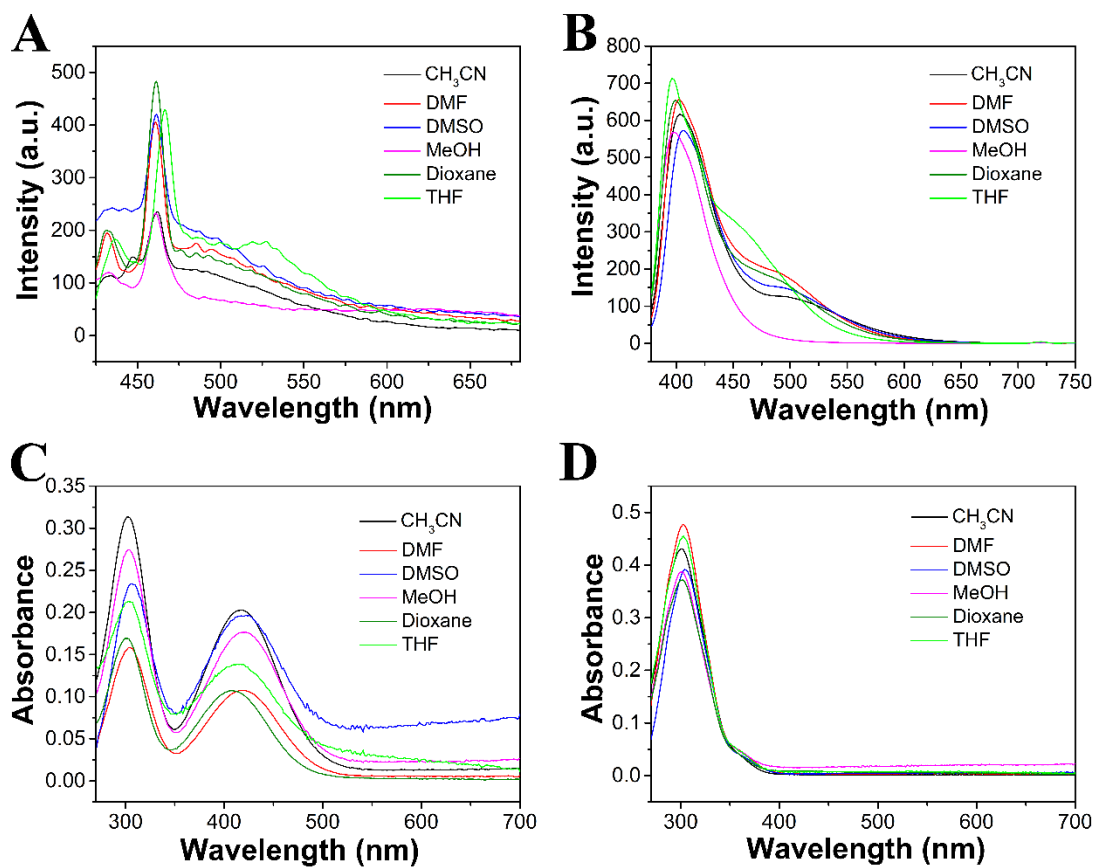

**Figure S12.** Fluorescence spectra of **TPP-Tba** (A) and compound **1** (B), and UV/vis spectra of **TPP-Tba** (C) and compound **1** (D) in different solvents. The excitation wavelengths for **TPP-Tba** and compound **1** were 405 nm and 358 nm, respectively.

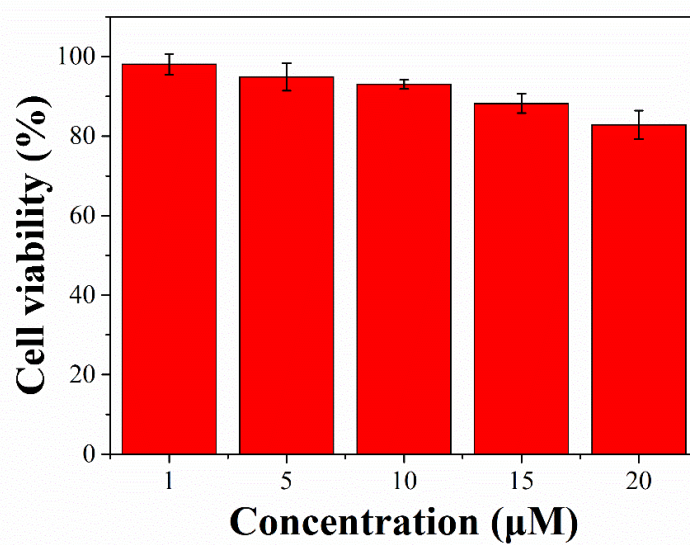

**Figure S13.** Relative HL-7702 cell viability incubated with different concentrations of TPP-Tba.

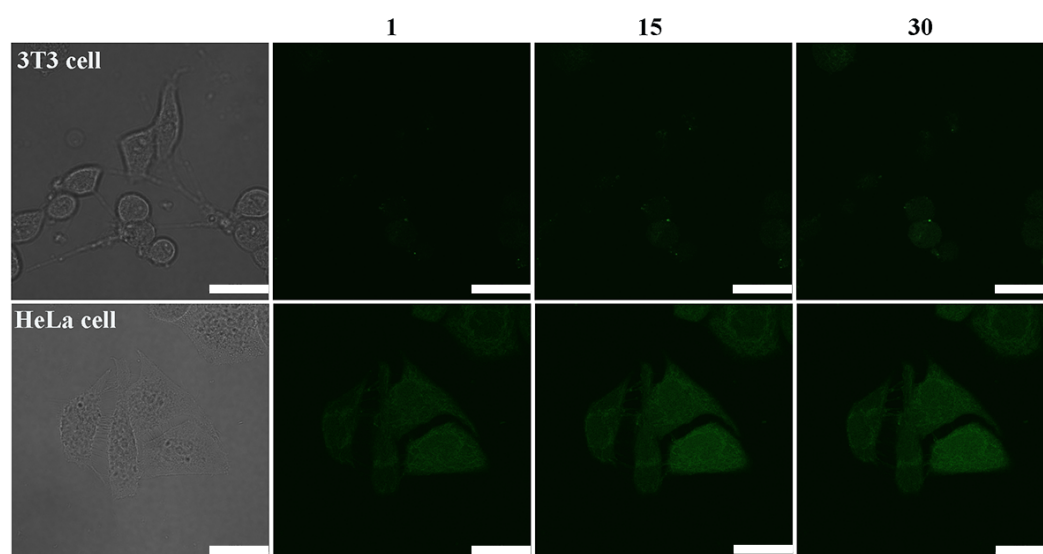

**Figure S14.** Confocal laser fluorescence images of 3T3 cell and HeLa cells staining with DCFH-DA kit to evaluate the ROS level of 3T3 cell and HeLa cell.  $\lambda_{\text{ex}} = 488 \text{ nm}$ ,  $\lambda_{\text{em}} = 500\text{-}550 \text{ nm}$ . The number of scans shown in the top of the picture, laser intensity of both two cells was kept the same. Scale bars =  $25 \mu\text{m}$ .
